# Supplementary material for: Daratumumab May Attenuate Cardiac Dysfunction Related to Carfilzomib in Patients with Relapsed/Refractory Multiple Myeloma: A Prospective Study
Source: MDPI journal article supplement (doi:10.3390/cancers13205057), 2021-10-09
Supplement: s1 [file s1]

# Daratumumab May Attenuate Cardiac Dysfunction Related to Carfilzomib in Patients with Relapsed/Refractory Multiple Myeloma; A Prospective Study

Table S1. Inclusion and exclusion criteria.

| Inclusion criteria                                                                                                                                                                                                                                                                     |
|----------------------------------------------------------------------------------------------------------------------------------------------------------------------------------------------------------------------------------------------------------------------------------------|
| Males and females at least 18 years of age                                                                                                                                                                                                                                             |
| Voluntary written informed consent before performance of any study-related procedure                                                                                                                                                                                                   |
| Documented relapsed or refractory multiple myeloma in need of therapy, after at least one previous line of therapy for myeloma                                                                                                                                                         |
| Eastern Cooperative Oncology Group (ECOG) performance status score of $\leq 2$                                                                                                                                                                                                         |
| Willingness and ability to participate in study procedures                                                                                                                                                                                                                             |
| Exclusion criteria                                                                                                                                                                                                                                                                     |
| Anti-myeloma treatment within 2 weeks prior to Cycle 1, Day 1                                                                                                                                                                                                                          |
| Cumulative dose of corticosteroids greater than or equal to the equivalent of 140mg prednisone for $\geq 4$ days or a dose of corticosteroids greater than or equal to the equivalent of 40 mg/day of dexamethasone for $\geq 4$ days within the 2-week period prior to Cycle 1, Day 1 |
| Clinically significant cardiac disease, including:                                                                                                                                                                                                                                     |
| Myocardial infarction within 6 months, or unstable or uncontrolled condition (e.g., unstable angina, congestive heart failure, New York Heart Association Class III-IV)                                                                                                                |
| Cardiac arrhythmia (CTCAE Grade 2 or higher) or clinically significant ECG abnormalities                                                                                                                                                                                               |
| ECG showing a baseline QT interval as corrected by Fridericia's formula (QTcF) $>470$ msec                                                                                                                                                                                             |
| Known active HBV, HCV or HIV.                                                                                                                                                                                                                                                          |
| Any of the following laboratory test results at baseline:                                                                                                                                                                                                                              |
| Absolute neutrophil count $\leq 1.0 \times 10^9/L$                                                                                                                                                                                                                                     |
| Hemoglobin level $\leq 7.5$ g/dL ( $\leq 5$ mmol/L)                                                                                                                                                                                                                                    |
| Platelet count $<75 \times 10^9/L$ ( $<50 \times 10^9/L$ in case of more than 50% bone marrow plasma cell invasion)                                                                                                                                                                    |
| Alanine aminotransferase level $\geq 2.5$ times the upper limit of normal                                                                                                                                                                                                              |
| Pregnant or nursing women                                                                                                                                                                                                                                                              |

Table S2. ICC Values.

| Parameter             | ICC Value for Healthy Individuals | ICC Value for Multiple Myeloma Patients |
|-----------------------|-----------------------------------|-----------------------------------------|
| LVEF                  | 0.934                             | 0.964                                   |
| LV GLS                | 0.990                             | 0.995                                   |
| LV strain rate S wave | 0.994                             | 0.985                                   |
| LV strain rate E wave | 0.973                             | 0.983                                   |
| LV Radial strain      | 0.952                             | 0.991                                   |
| PALS                  | 0.992                             | 0.990                                   |
| LA strain rate S      | 0.980                             | 0.992                                   |
| RV free wall strain   | 0.943                             | 0.939                                   |
| RV strain             | 0.943                             | 0.913                                   |

LVEF; left ventricular ejection fraction, LV; left ventricular, LA; left atrial, RV; right ventricular, GLS; global longitudinal strain, PALS; peak atrial longitudinal strain.
